# Supplementary material for: Small extracellular vesicles derived from umbilical cord mesenchymal stem cells alleviate radiation-induced cardiac organoid injury
Source: PubMed Central journal article supplement — Stem Cell Res Ther. 2024 Dec 20;15:493. doi: 10.1186/s13287-024-04115-2 (PMC11662859; doi:10.1186/s13287-024-04115-2), 2024-12-20
Supplement: 13287_2024_4115_MOESM16_ESM.pdf [file 13287_2024_4115_MOESM16_ESM.pdf]

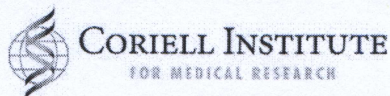

**MATERIAL TRANSFER AGREEMENT**  
For access to Allen Institute for Cell Science Human iPSC Collection  
at the Coriell Institute for Medical Research

The purpose of this implementing letter is to provide a record of the biological material transfer and to memorialize the agreement between the Provider and Administrator, together, (identified below) and the Recipient (identified below) to abide by all terms and conditions of this implementing letter, the Uniform Biological Material Transfer Agreement, and the Additional Terms (collectively, the "Agreement"). Upon specifying the material to be transferred and execution of this Agreement implementing letter by Recipient Authorized Institutional Official and Recipient PI, the Agreement shall be deemed fully executed and effective as of the last Recipient signature date.

The Agreement incorporates the additional terms and conditions ("Additional Terms") available at (<https://catalog.coriell.org/1/AllenCellCollection/MTA-and-Additional-Terms>). In the event of a conflict between the terms below and the Additional Terms, the Additional Terms shall govern.

| <b>Provider</b> (organization providing Original Material)                                                                       | <b>Recipient</b> (organization receiving Original Material)                                  |
|----------------------------------------------------------------------------------------------------------------------------------|----------------------------------------------------------------------------------------------|
| Name: Allen Institute for Cell Science<br>Address: 615 Westlake Ave N., Seattle WA 98109<br><br>(No specific Provider Scientist) | Name: <i>Academy of military Sciences</i><br>Address: <i>27 Taiping Road, Beijing 100850</i> |

| <b>Administrator</b>                                                                          | <b>Recipient Scientist</b>                     |
|-----------------------------------------------------------------------------------------------|------------------------------------------------|
| Name: Coriell Institute for Medical Research<br>Address: 403 Haddon Avenue, Camden, NJ, 08103 | Name: <i>Ying-xia Tan</i><br>Title: <i>Dr.</i> |

|                                                                                                                                  |
|----------------------------------------------------------------------------------------------------------------------------------|
| <b>Original Material:</b> <i>iPSC from fibroblast</i>                                                                            |
| <b>Research Purpose (optional 1-2 sentences):</b><br><i>Constructing heart or other tissues' organoids using this cell line.</i> |

| <b>Recipient Authorized Institutional Official</b>                                                                               | <b>Recipient PI Signatory</b>                                                                   |
|----------------------------------------------------------------------------------------------------------------------------------|-------------------------------------------------------------------------------------------------|
| Signature<br><i>Quan Wang</i><br>Name/Title<br><i>Institutional Technology Administrator</i><br>Date<br><i>October, 25, 2021</i> | Signature<br><i>Ying-xia Tan</i><br>Name/Title<br><i>Dr.</i><br>Date<br><i>October 25, 2021</i> |
