# Supplementary figures and images for: Small extracellular vesicles derived from umbilical cord mesenchymal stem cells alleviate radiation-induced cardiac organoid injury
Source: PubMed Central journal article supplement — Stem Cell Res Ther. 2024 Dec 20;15:493. doi: 10.1186/s13287-024-04115-2 (PMC11662859; doi:10.1186/s13287-024-04115-2), 2024-12-20

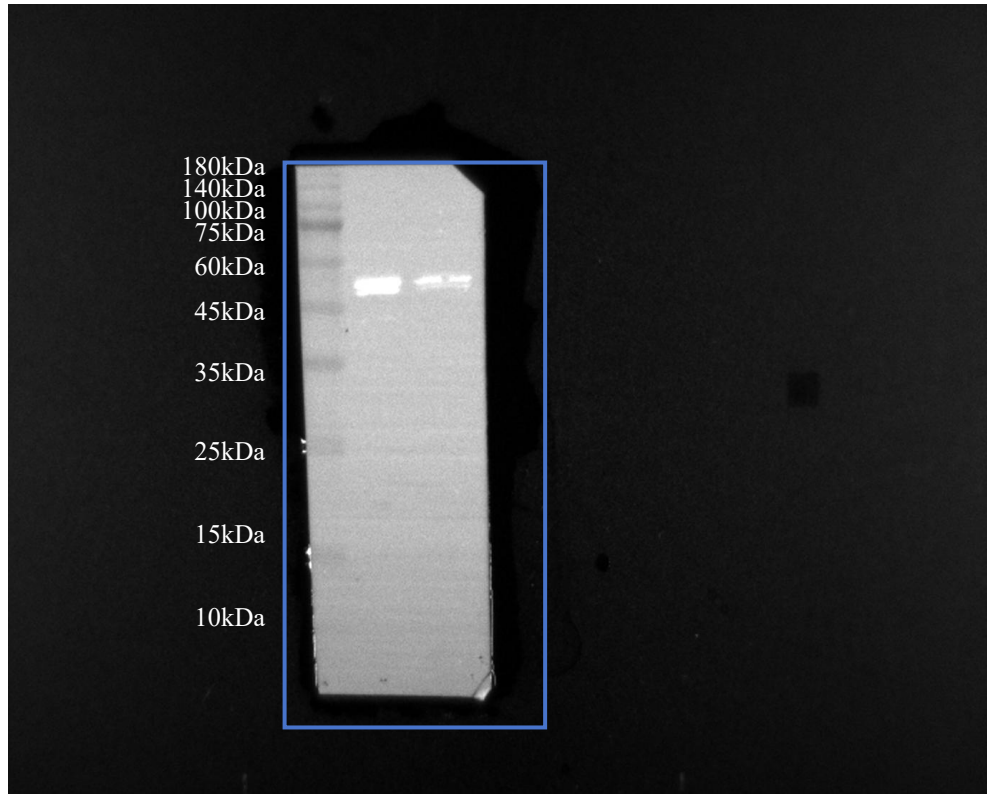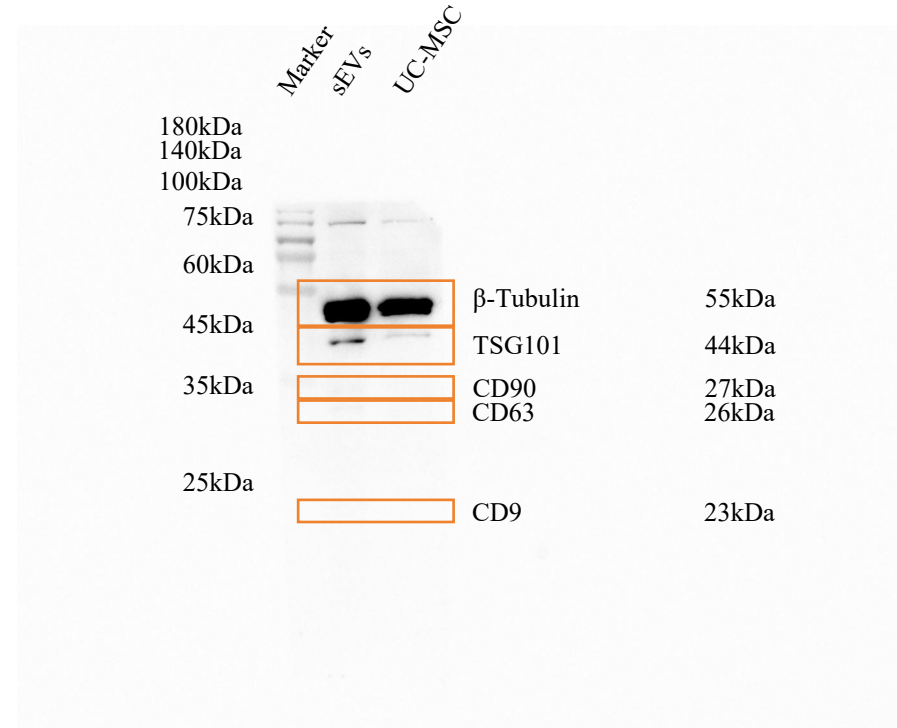

A whole sheet of WB film

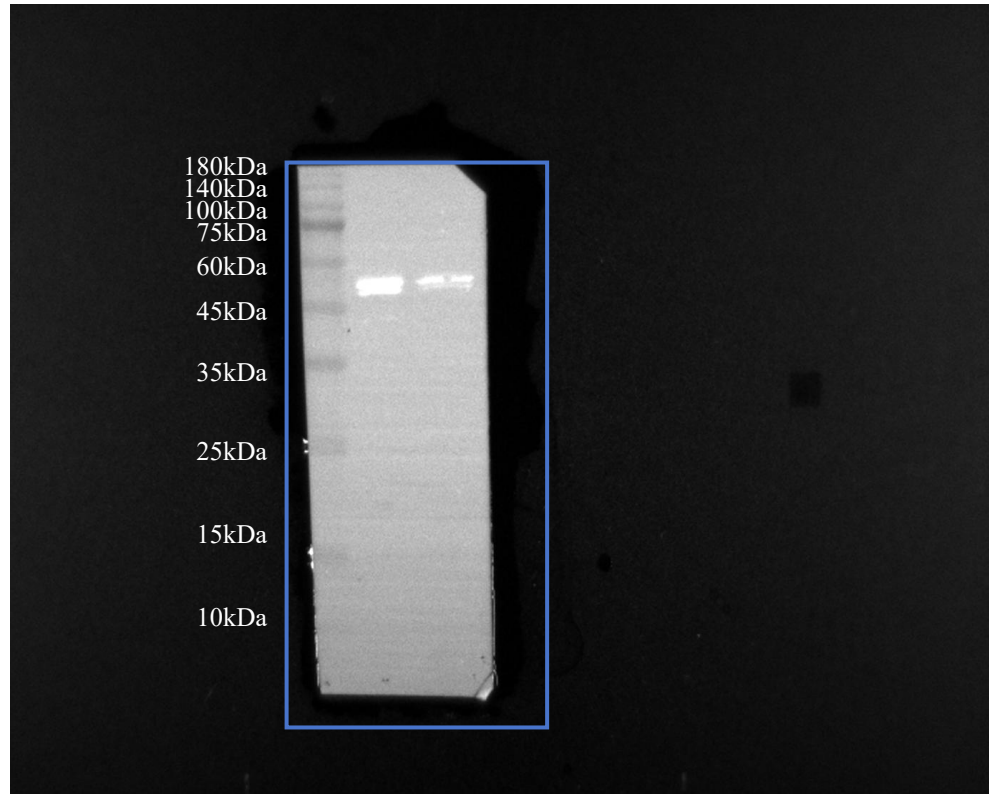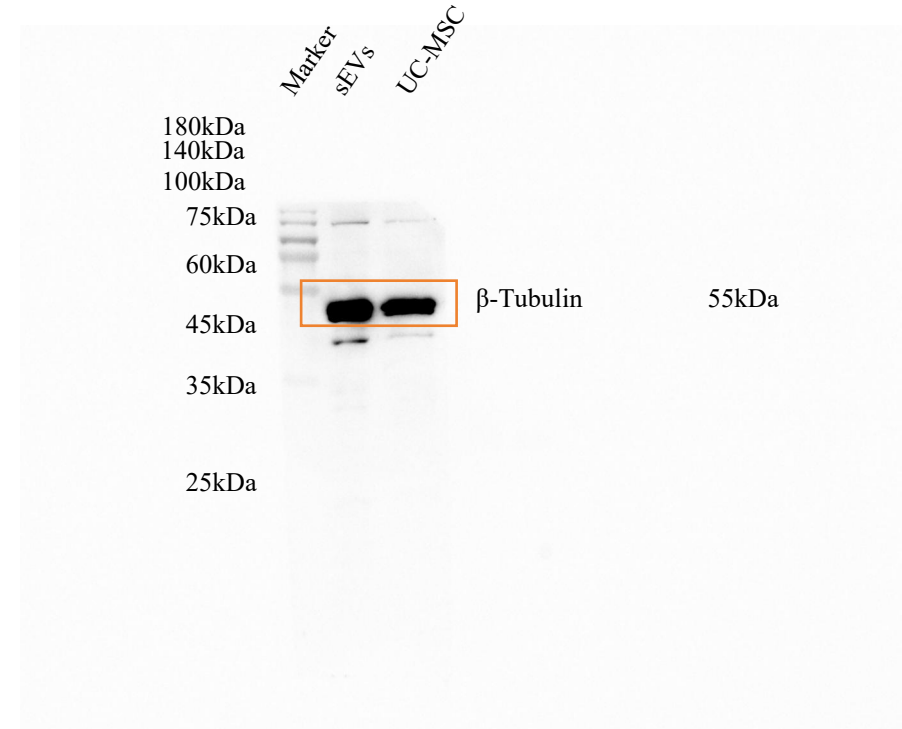

$\beta$ -Tubulin

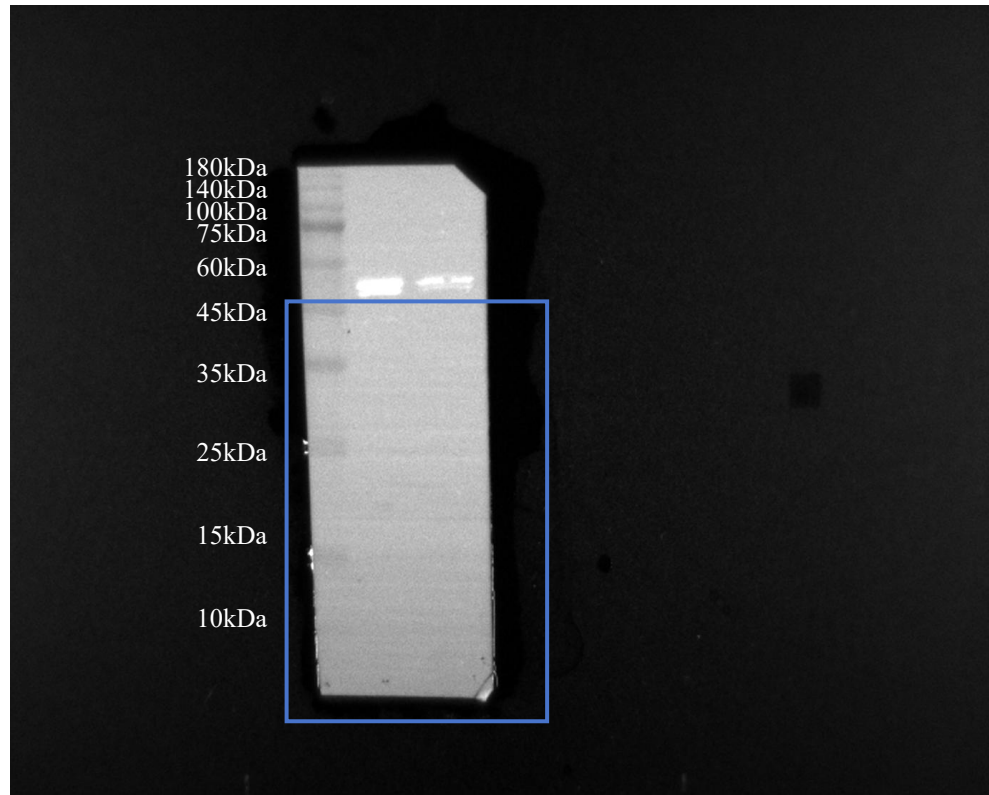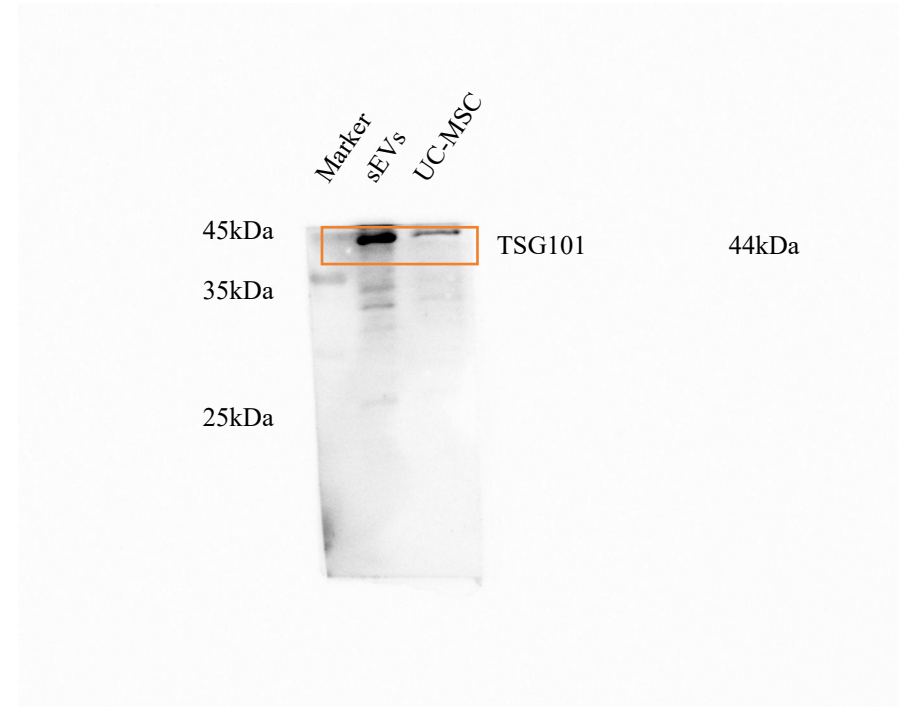

TSG 101

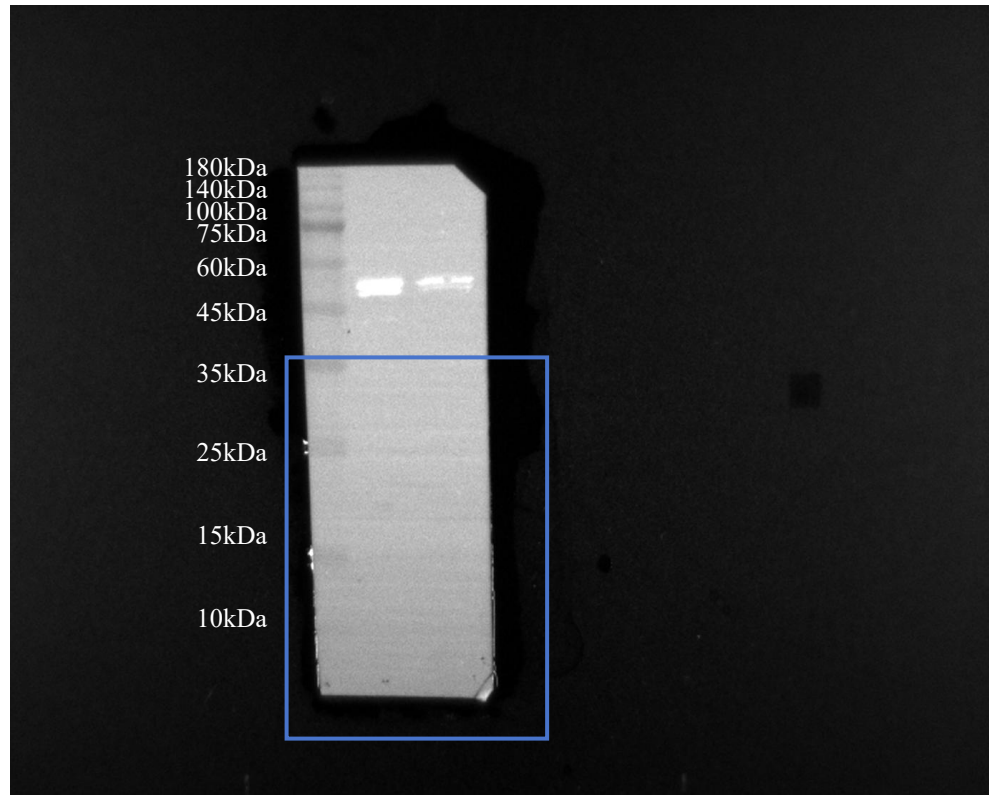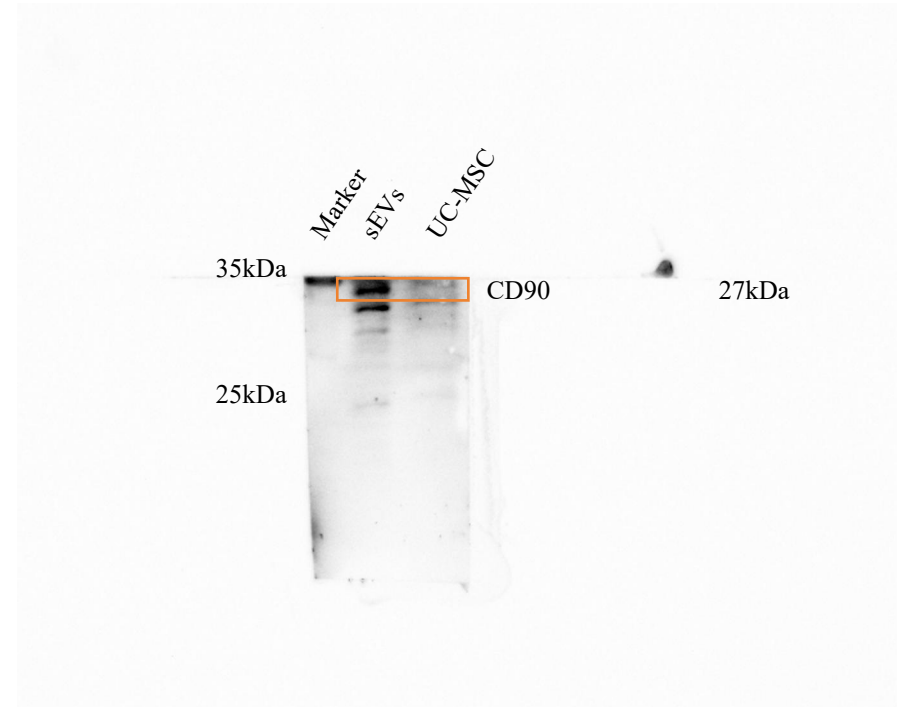

CD 90

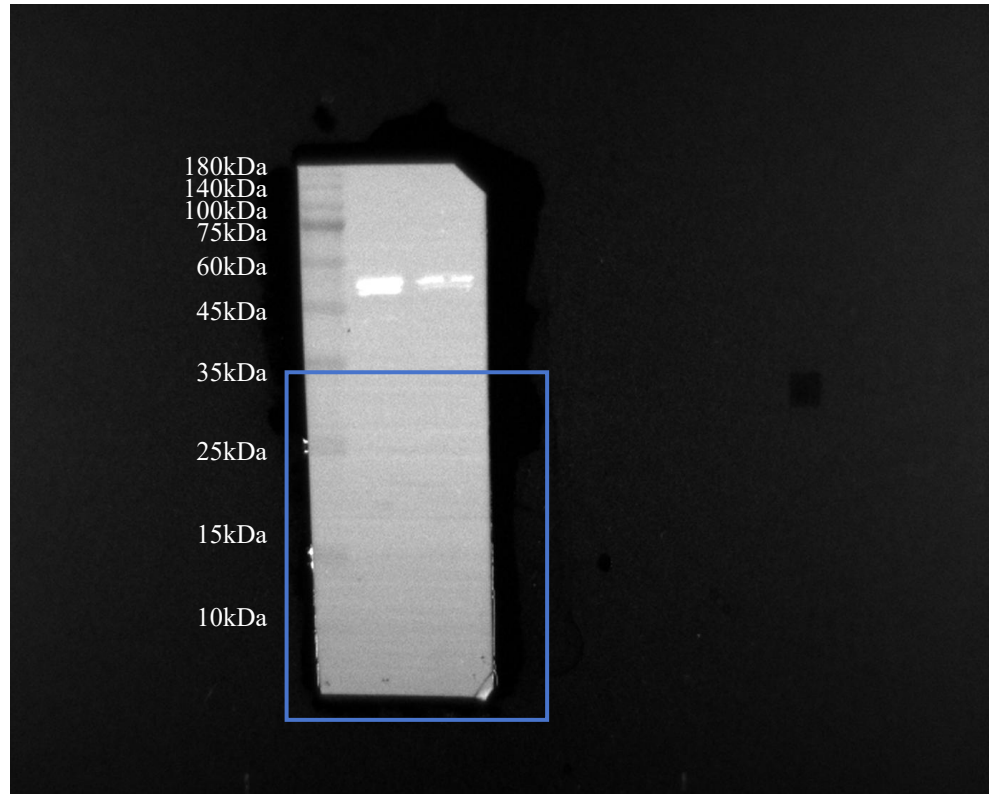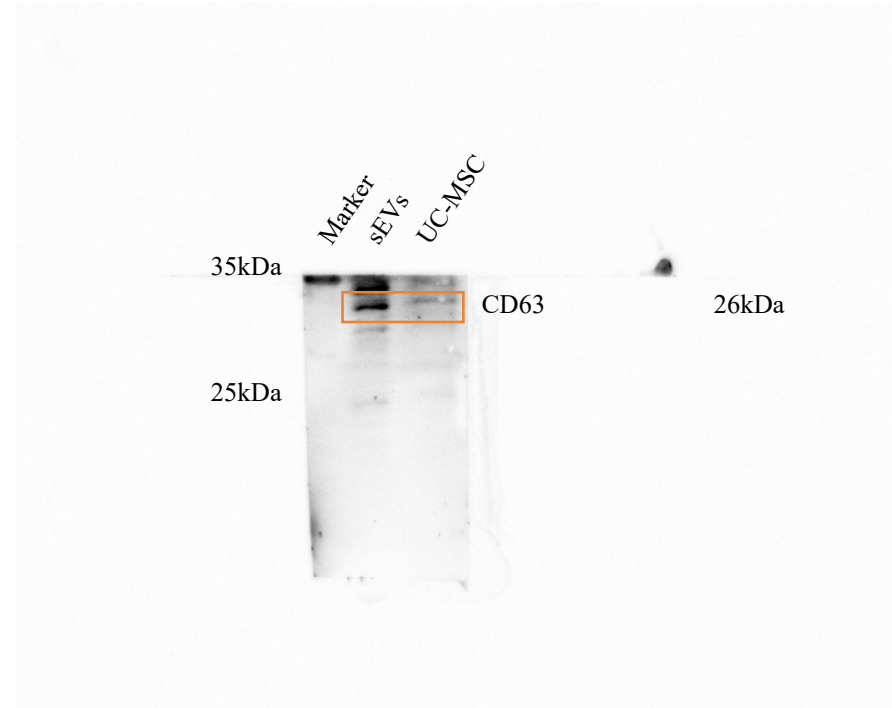

CD 63

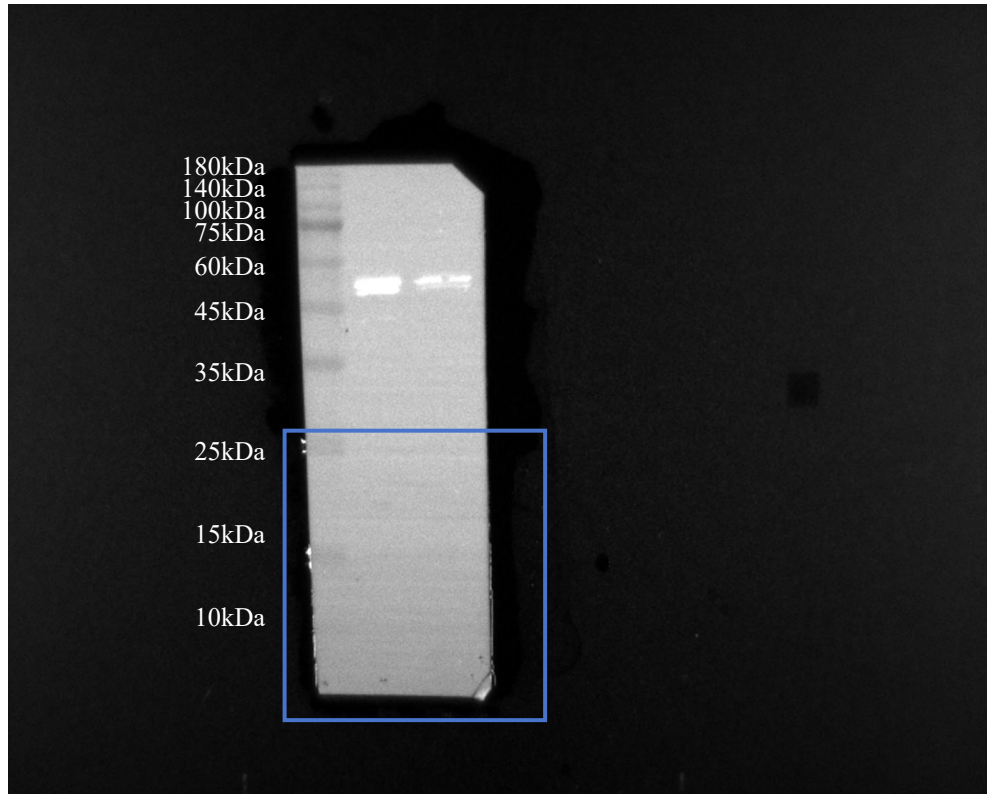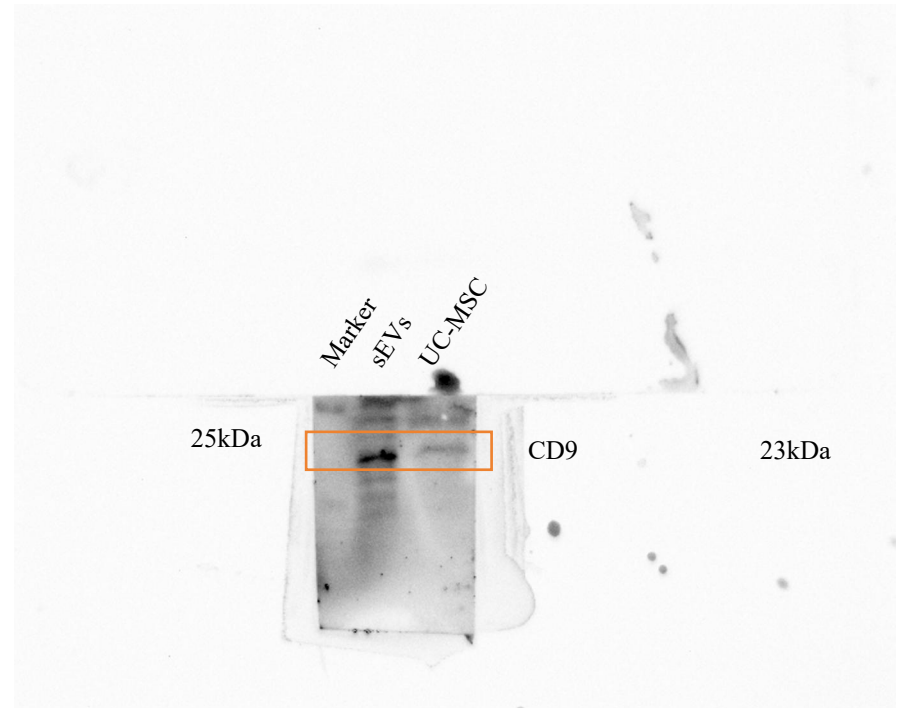

CD 9

Supplement: 13287_2024_4115_MOESM14_ESM.pdf [file 13287_2024_4115_MOESM14_ESM.pdf]
